# Supplementary material for: Integrated Hemicellulose Extraction and Papermaking Fiber Production from Agro-Waste Biomass
Source: MDPI journal article supplement (doi:10.3390/polym15234597), 2023-12-01

|                        |                                                                                                                                   |                       |                      |
|------------------------|-----------------------------------------------------------------------------------------------------------------------------------|-----------------------|----------------------|
| <b>File Name</b>       | E:\SUSTECLCR PED 2023\DISEMINARE 2023\ARTICOL DATE 2023\SELECTATE PENTRU SUPLEMENTARY\FTIR DATA\HC_(O)EL_9-28-2023T9-32-39 AM.SPC |                       |                      |
| <b>Date</b>            | 28 Sep 2023 09:33:52                                                                                                              | <b>Technique</b>      | Infrared             |
| <b>Spectral Region</b> | IR                                                                                                                                | <b>X Axis</b>         | Wavenumber (cm-1)    |
| <b>Y Axis</b>          | Absorbance                                                                                                                        | <b>Spectrum Range</b> | 400.6890 - 3999.4336 |
| <b>Points Count</b>    | 1932                                                                                                                              | <b>Data Spacing</b>   | 1.8637               |

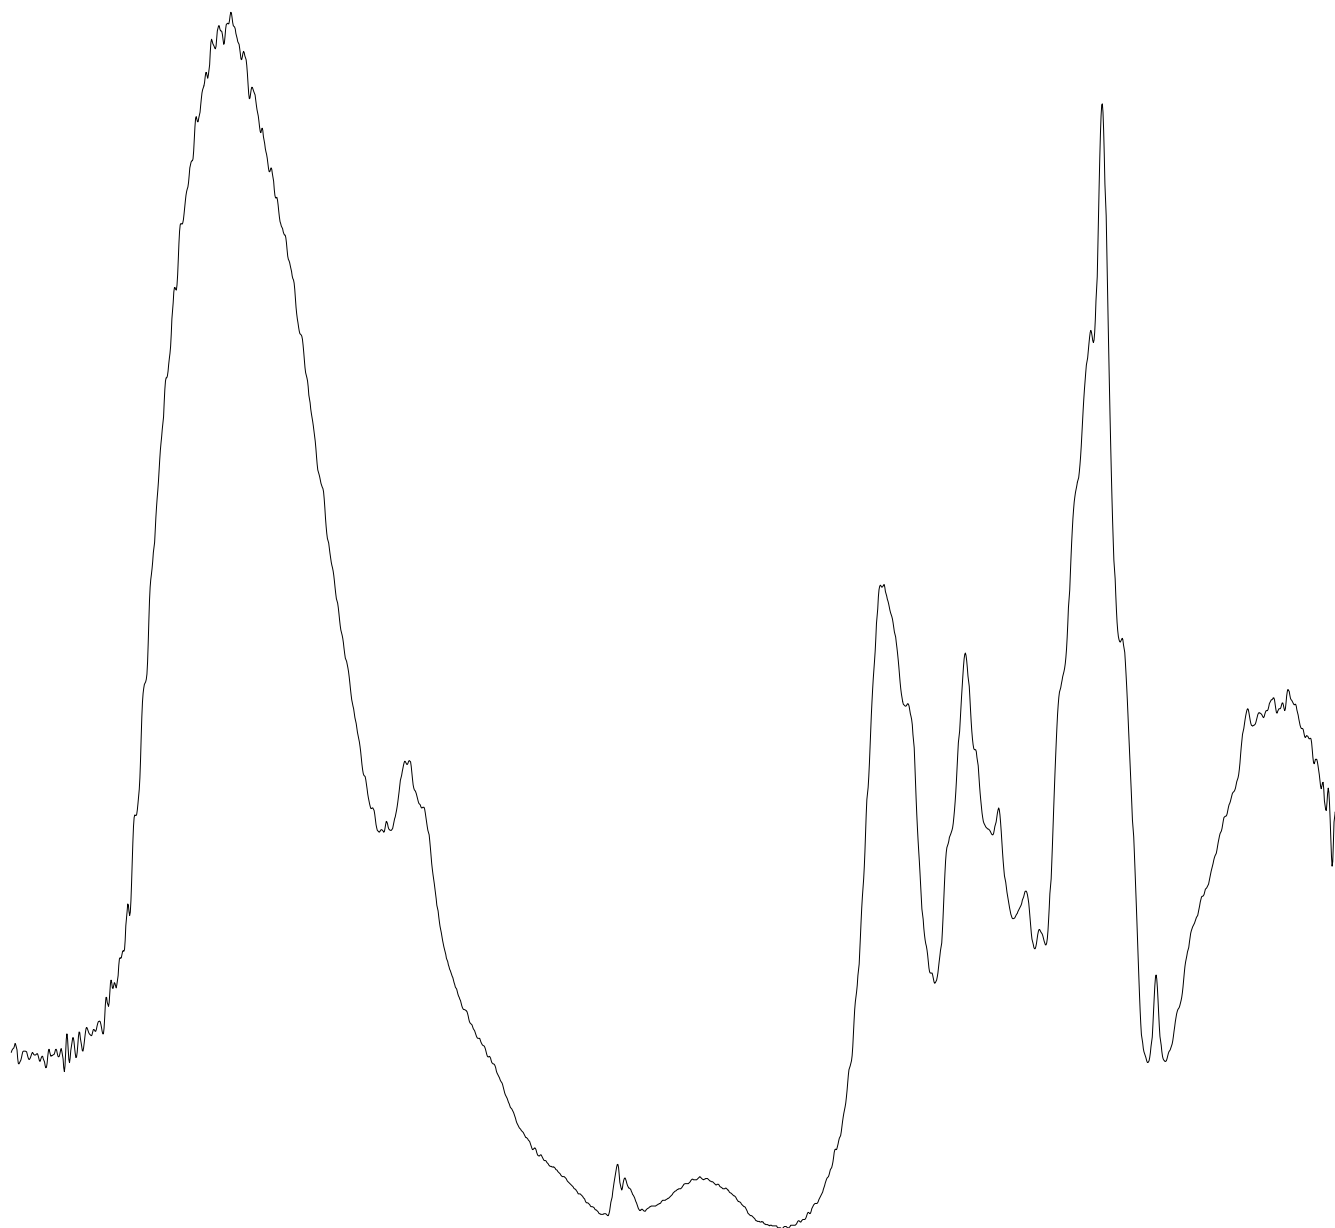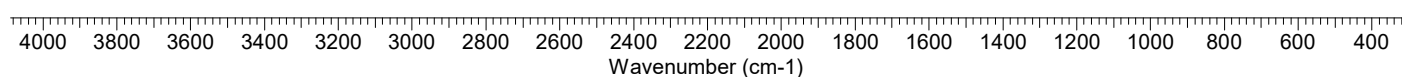

|                        |                                                                                                                                    |                       |                      |
|------------------------|------------------------------------------------------------------------------------------------------------------------------------|-----------------------|----------------------|
| <b>File Name</b>       | E:\SUSTECLCR PED 2023\DISEMINARE 2023\ARTICOL DATE 2023\SELECTATE PENTRU SUPPLEMENTARY\FTIR DATA\HC_(O)BL_9-28-2023T9-46-20 AM.SPC |                       |                      |
| <b>Date</b>            | 28 Sep 2023 09:46:50                                                                                                               | <b>Technique</b>      | Infrared             |
| <b>Spectral Region</b> | IR                                                                                                                                 | <b>X Axis</b>         | Wavenumber (cm-1)    |
| <b>Y Axis</b>          | Absorbance                                                                                                                         | <b>Spectrum Range</b> | 400.6890 - 3999.4336 |
| <b>Points Count</b>    | 1932                                                                                                                               | <b>Data Spacing</b>   | 1.8637               |

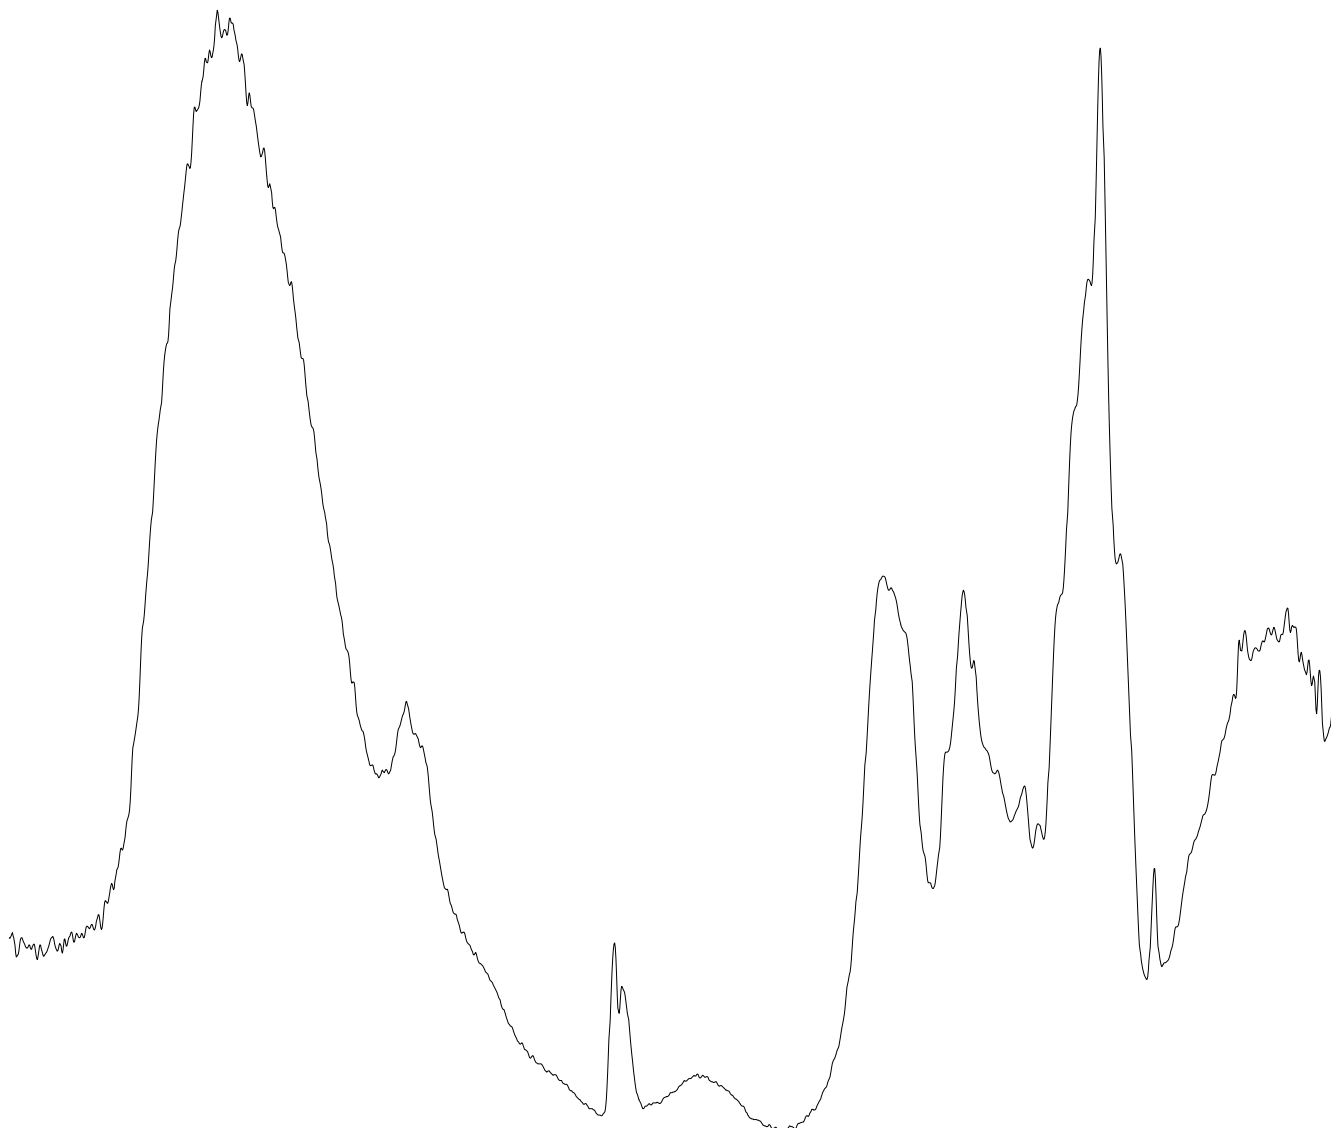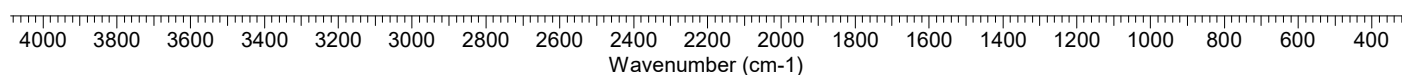

|                        |                                                                                                                                  |                       |                      |
|------------------------|----------------------------------------------------------------------------------------------------------------------------------|-----------------------|----------------------|
| <b>File Name</b>       | E:\SUSTECLCR PED 2023\DISEMINARE 2023\ARTICOL DATE 2023\SELECTATE PENTRU SUPPLEMENTARY\FTIR DATA\HC_HCE_9-28-2023T9-24-24 AM.SPC |                       |                      |
| <b>Date</b>            | 28 Sep 2023 09:25:46                                                                                                             | <b>Technique</b>      | Infrared             |
| <b>Spectral Region</b> | IR                                                                                                                               | <b>X Axis</b>         | Wavenumber (cm-1)    |
| <b>Y Axis</b>          | Absorbance                                                                                                                       | <b>Spectrum Range</b> | 400.6890 - 3999.4336 |
| <b>Points Count</b>    | 1932                                                                                                                             | <b>Data Spacing</b>   | 1.8637               |

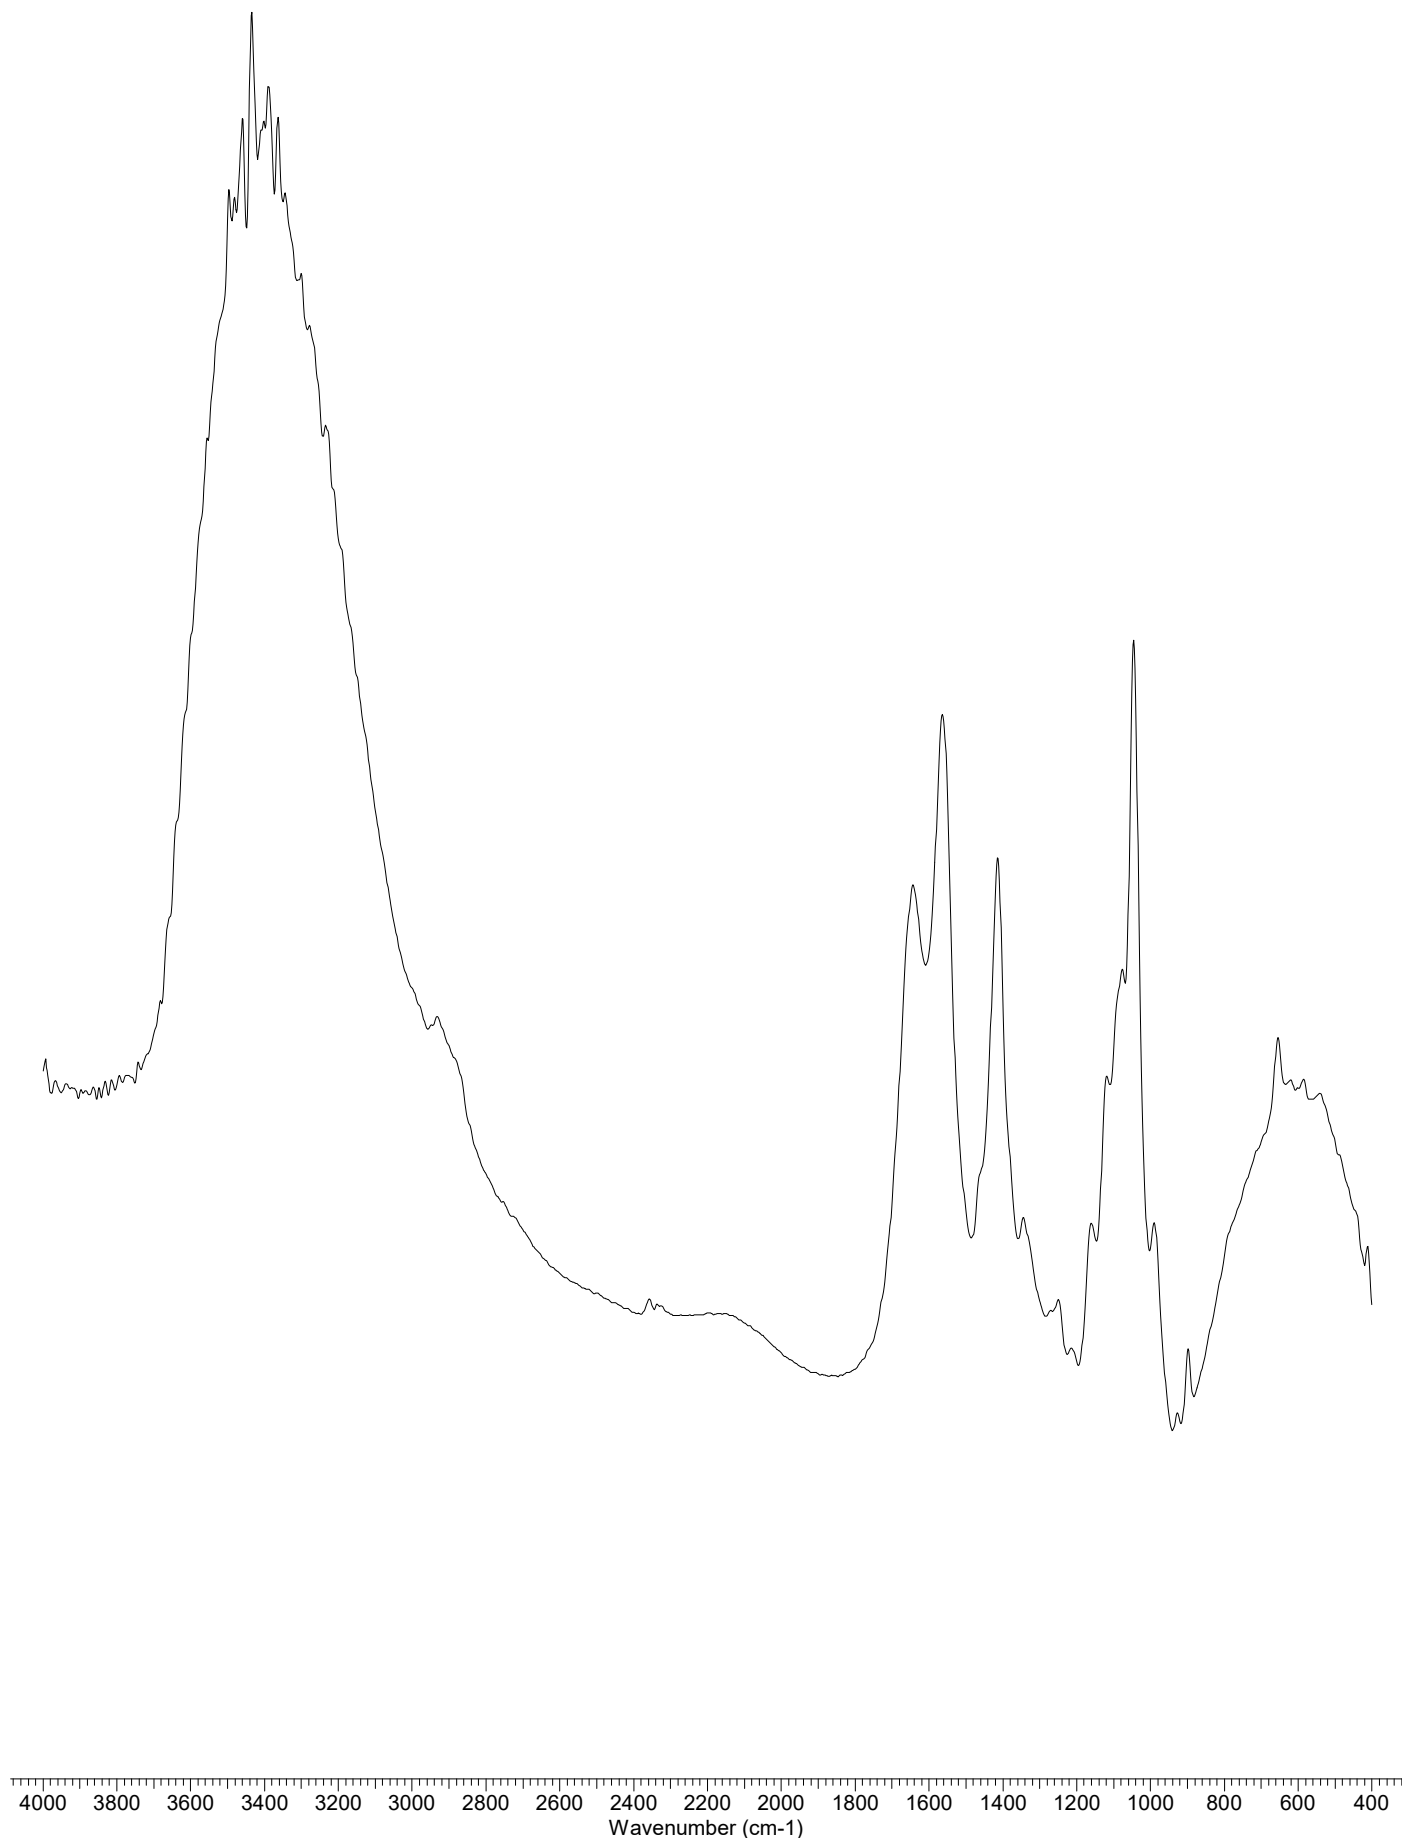

|                        |                                                                                                         |                       |                      |
|------------------------|---------------------------------------------------------------------------------------------------------|-----------------------|----------------------|
| <b>File Name</b>       | E:\SUSTECLCR PED 2023\DISEMINARE 2023\ARTICOL DATE 2023\SELECTATE PENTRU SUPLEMENTARY\FTIR DATA\XSA.SPC |                       |                      |
| <b>Date</b>            | 02 Oct 2023 13:26:56                                                                                    | <b>Technique</b>      | Infrared             |
| <b>Spectral Region</b> | IR                                                                                                      | <b>X Axis</b>         | Wavenumber (cm-1)    |
| <b>Y Axis</b>          | Absorbance                                                                                              | <b>Spectrum Range</b> | 400.6890 - 3999.4336 |
| <b>Points Count</b>    | 1932                                                                                                    | <b>Data Spacing</b>   | 1.8637               |

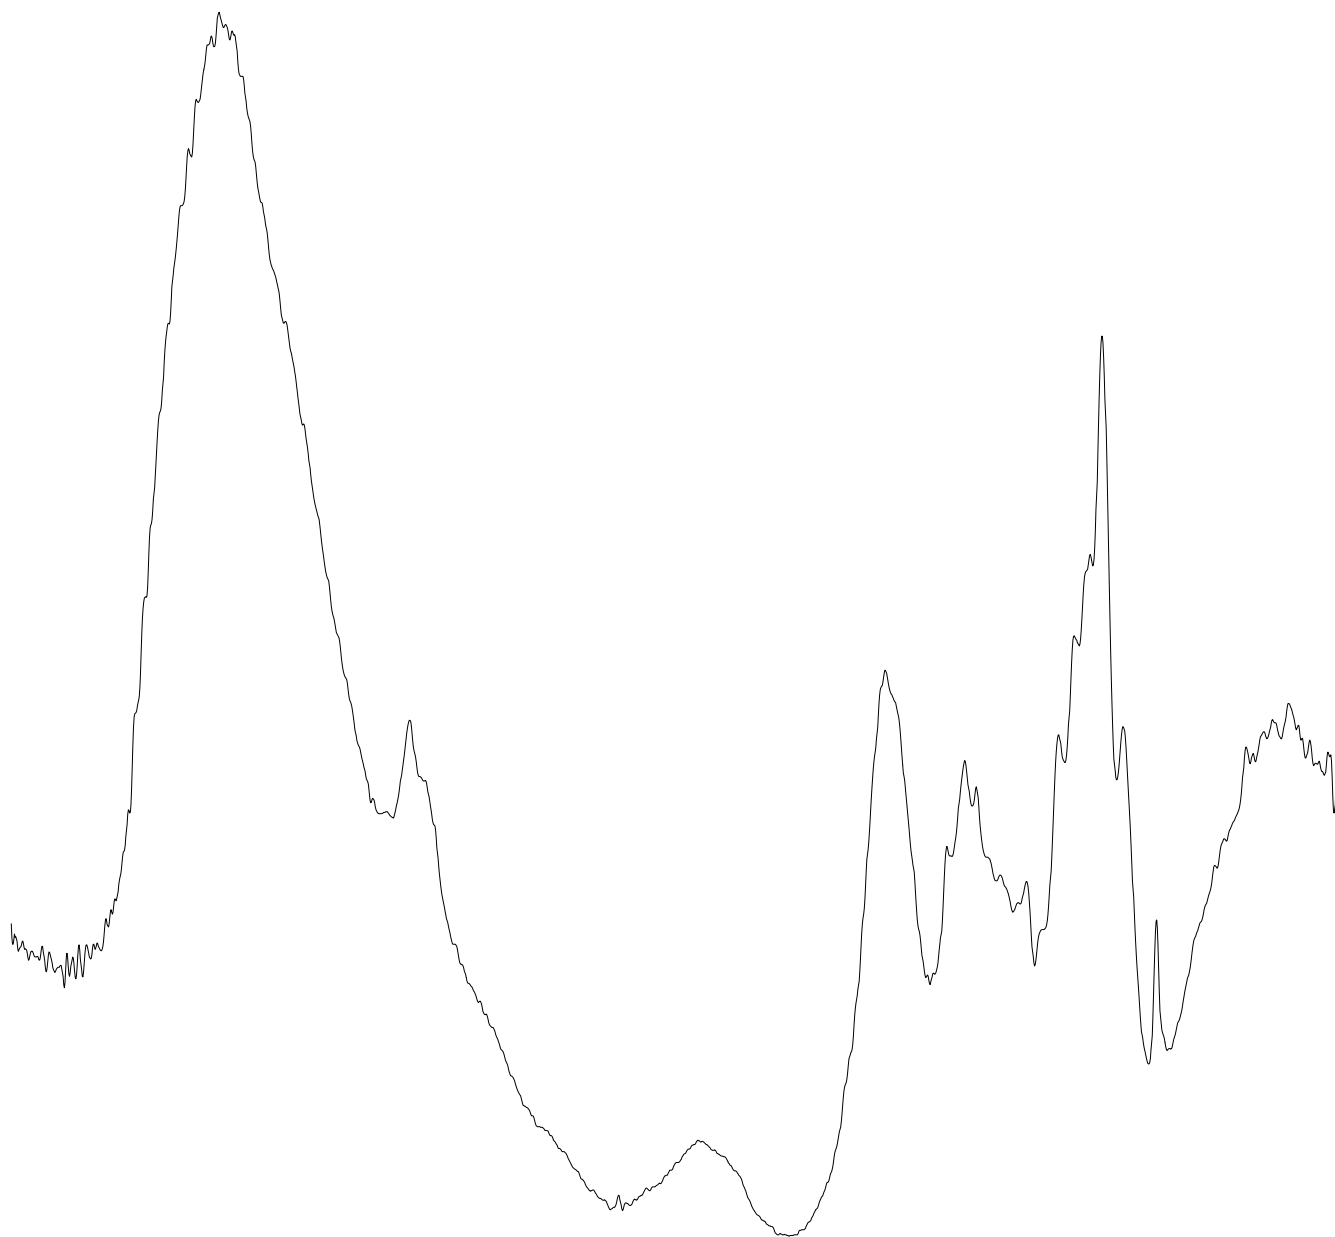

Supplement: s1 [file s1]
