# Supplementary material for: Integrated Hemicellulose Extraction and Papermaking Fiber Production from Agro-Waste Biomass
Source: MDPI journal article supplement (doi:10.3390/polym15234597), 2023-12-01

Instrument Bruker  
 NEO-1 400 (ICMPP)  
 Operator AGL  
 Registry No 14025  
 User Adrian Puitel  
 Sample name HC(O)-EL  
 prep AGL;  
 @H1-QNP-3 D2O  
 {E:\UTI\AdrianPuitel}  
 ICON-NMR-Lab 5

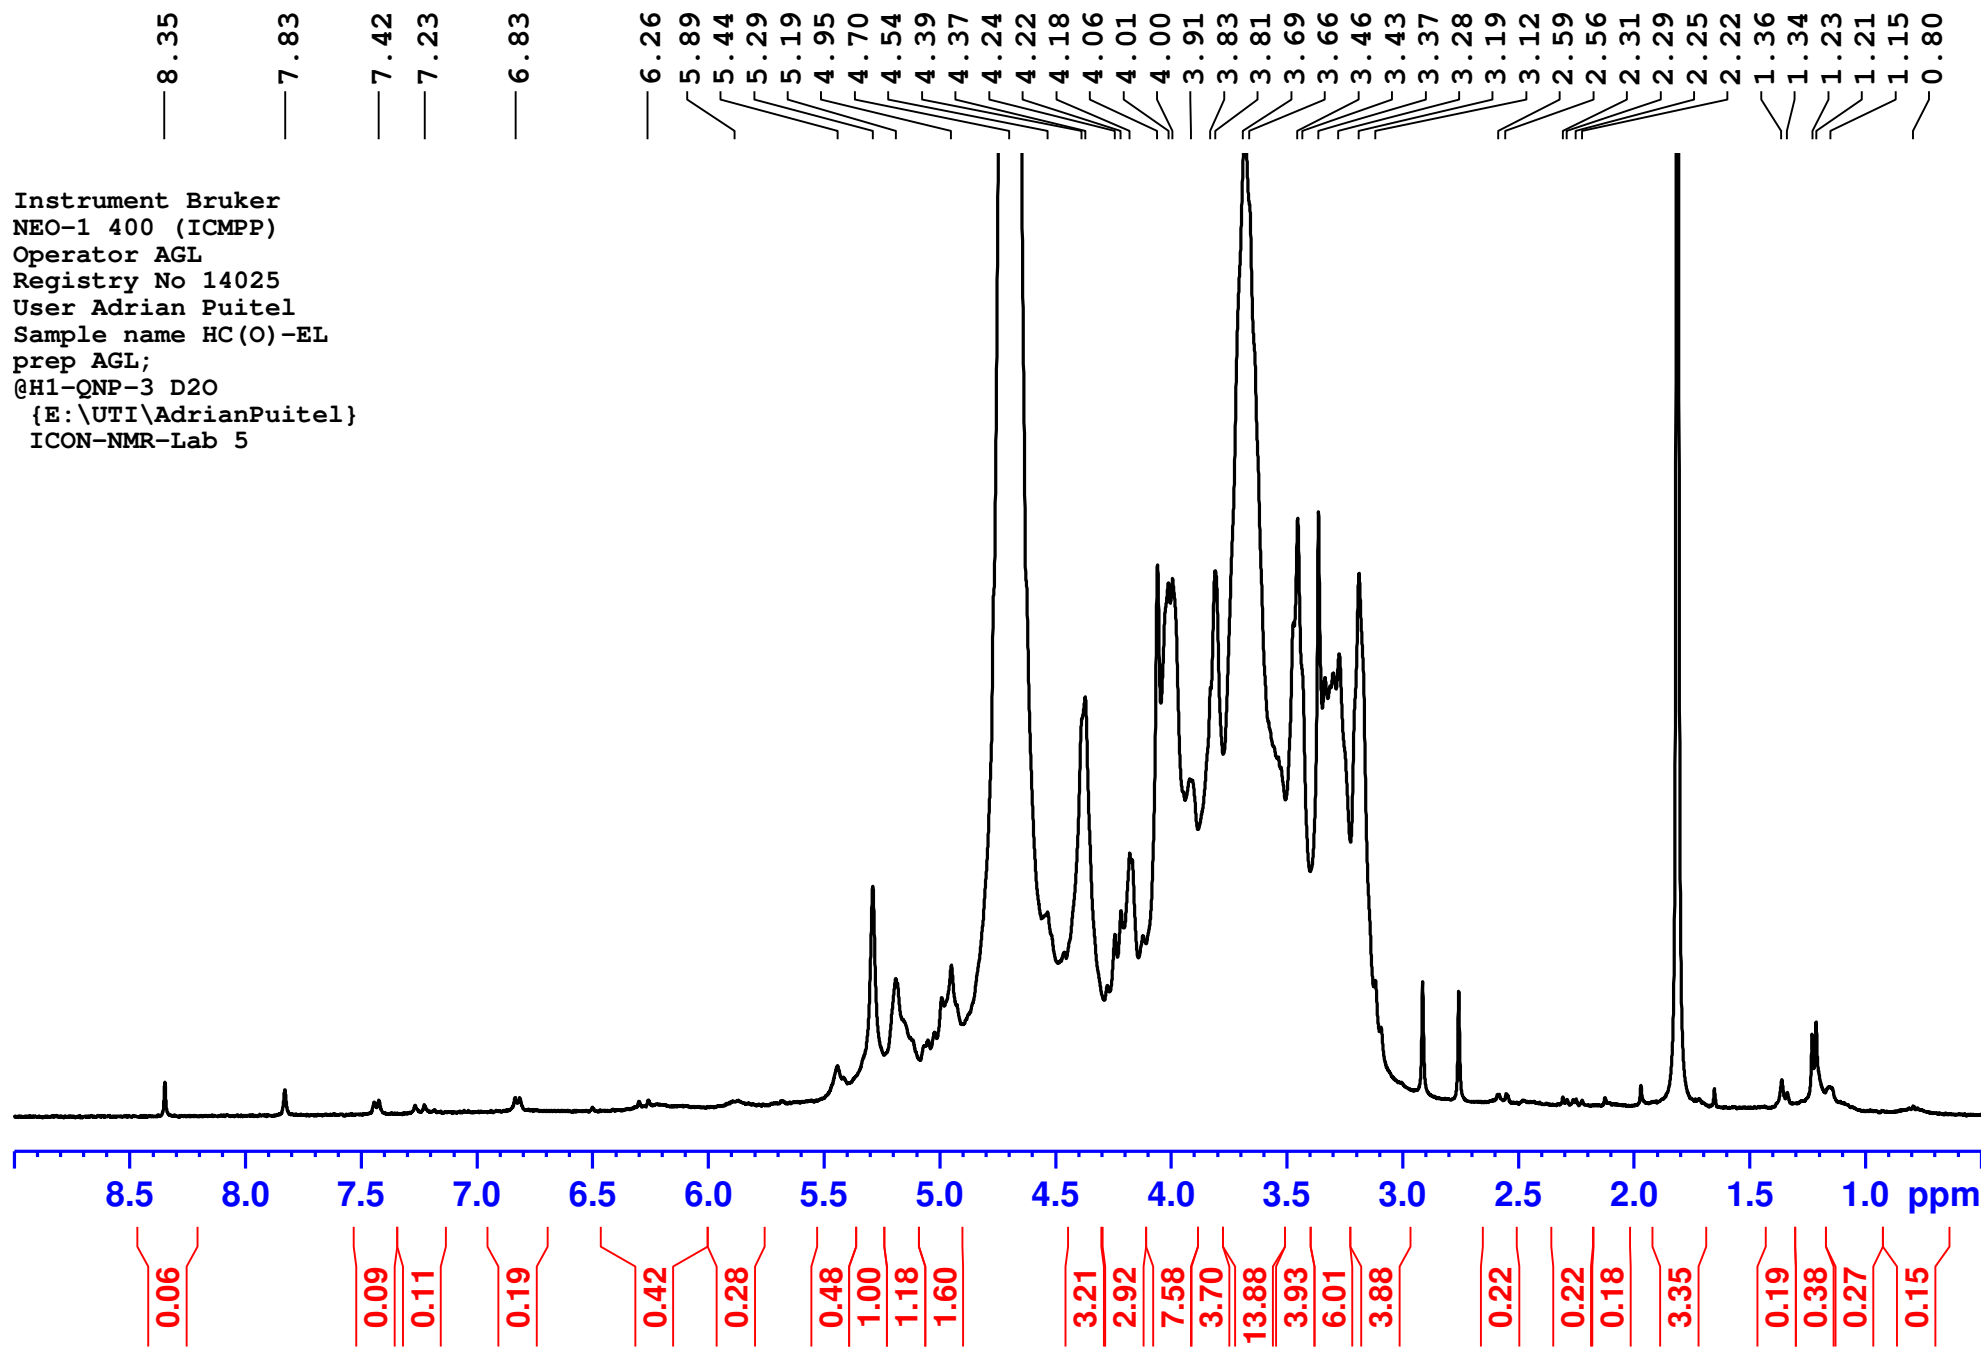

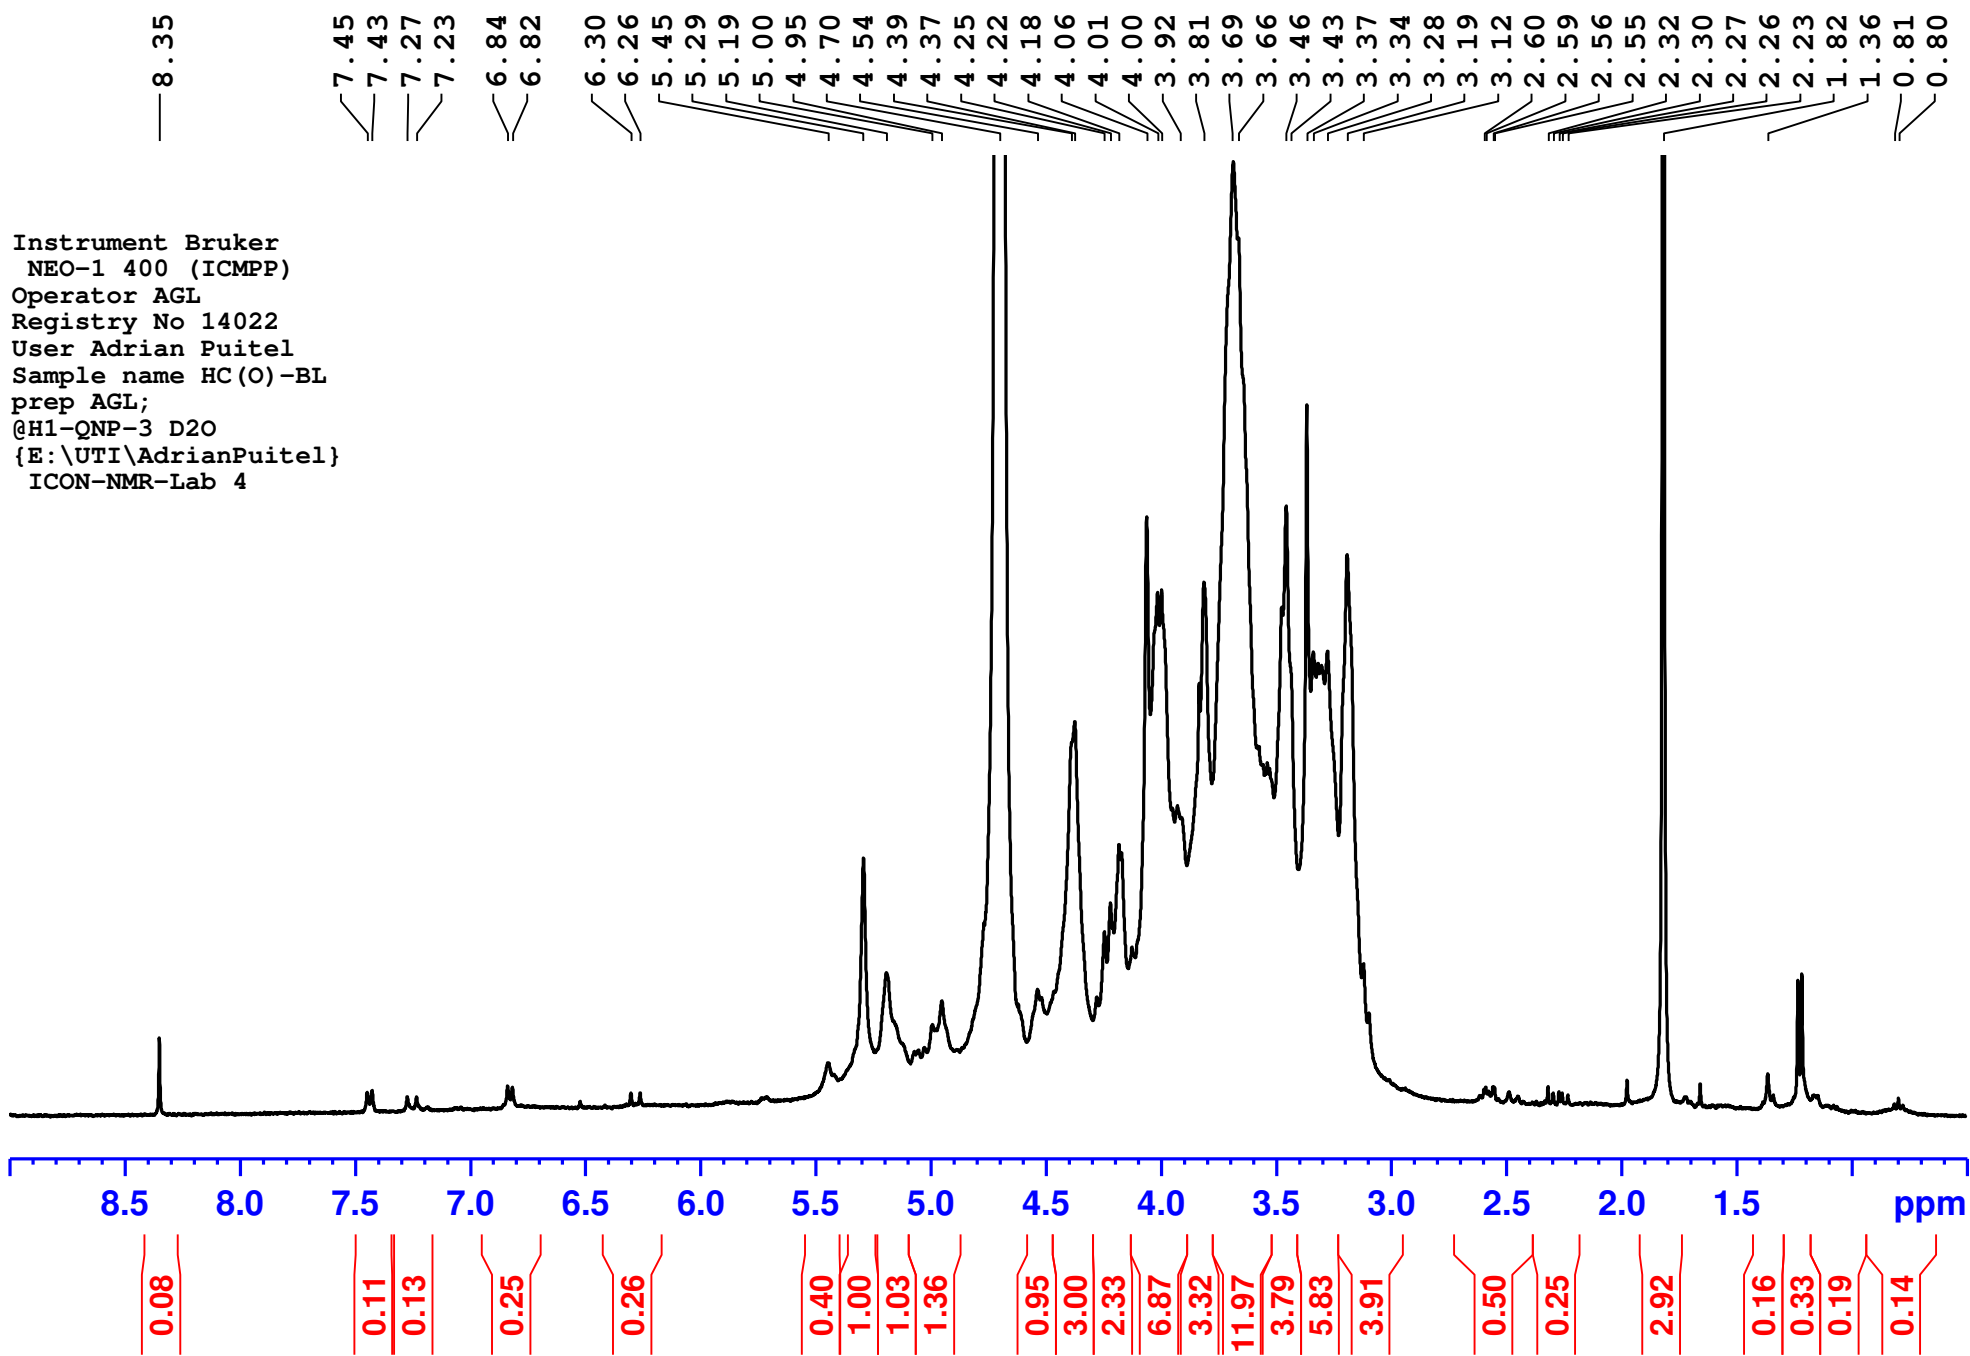

— 8.35

Instrument Bruker  
NEO-1 400 (ICMPP)  
Operator AGL  
Registry No 14027  
User Adrian Puitel  
Sample name HC-HCE  
prep AGL;  
@H1-QNP-3 D2O  
{E:\UTI\AdrianPuitel}  
ICON-NMR-Lab 16

5.44  
5.29  
5.19  
4.70  
4.39  
4.37  
4.24  
4.22  
4.18  
4.06  
4.01  
3.99  
3.83  
3.81  
3.69  
3.66  
3.64  
3.61  
3.45  
3.43  
3.36  
3.34  
3.27  
3.19  
3.12  
— 1.83  
1.23  
1.21

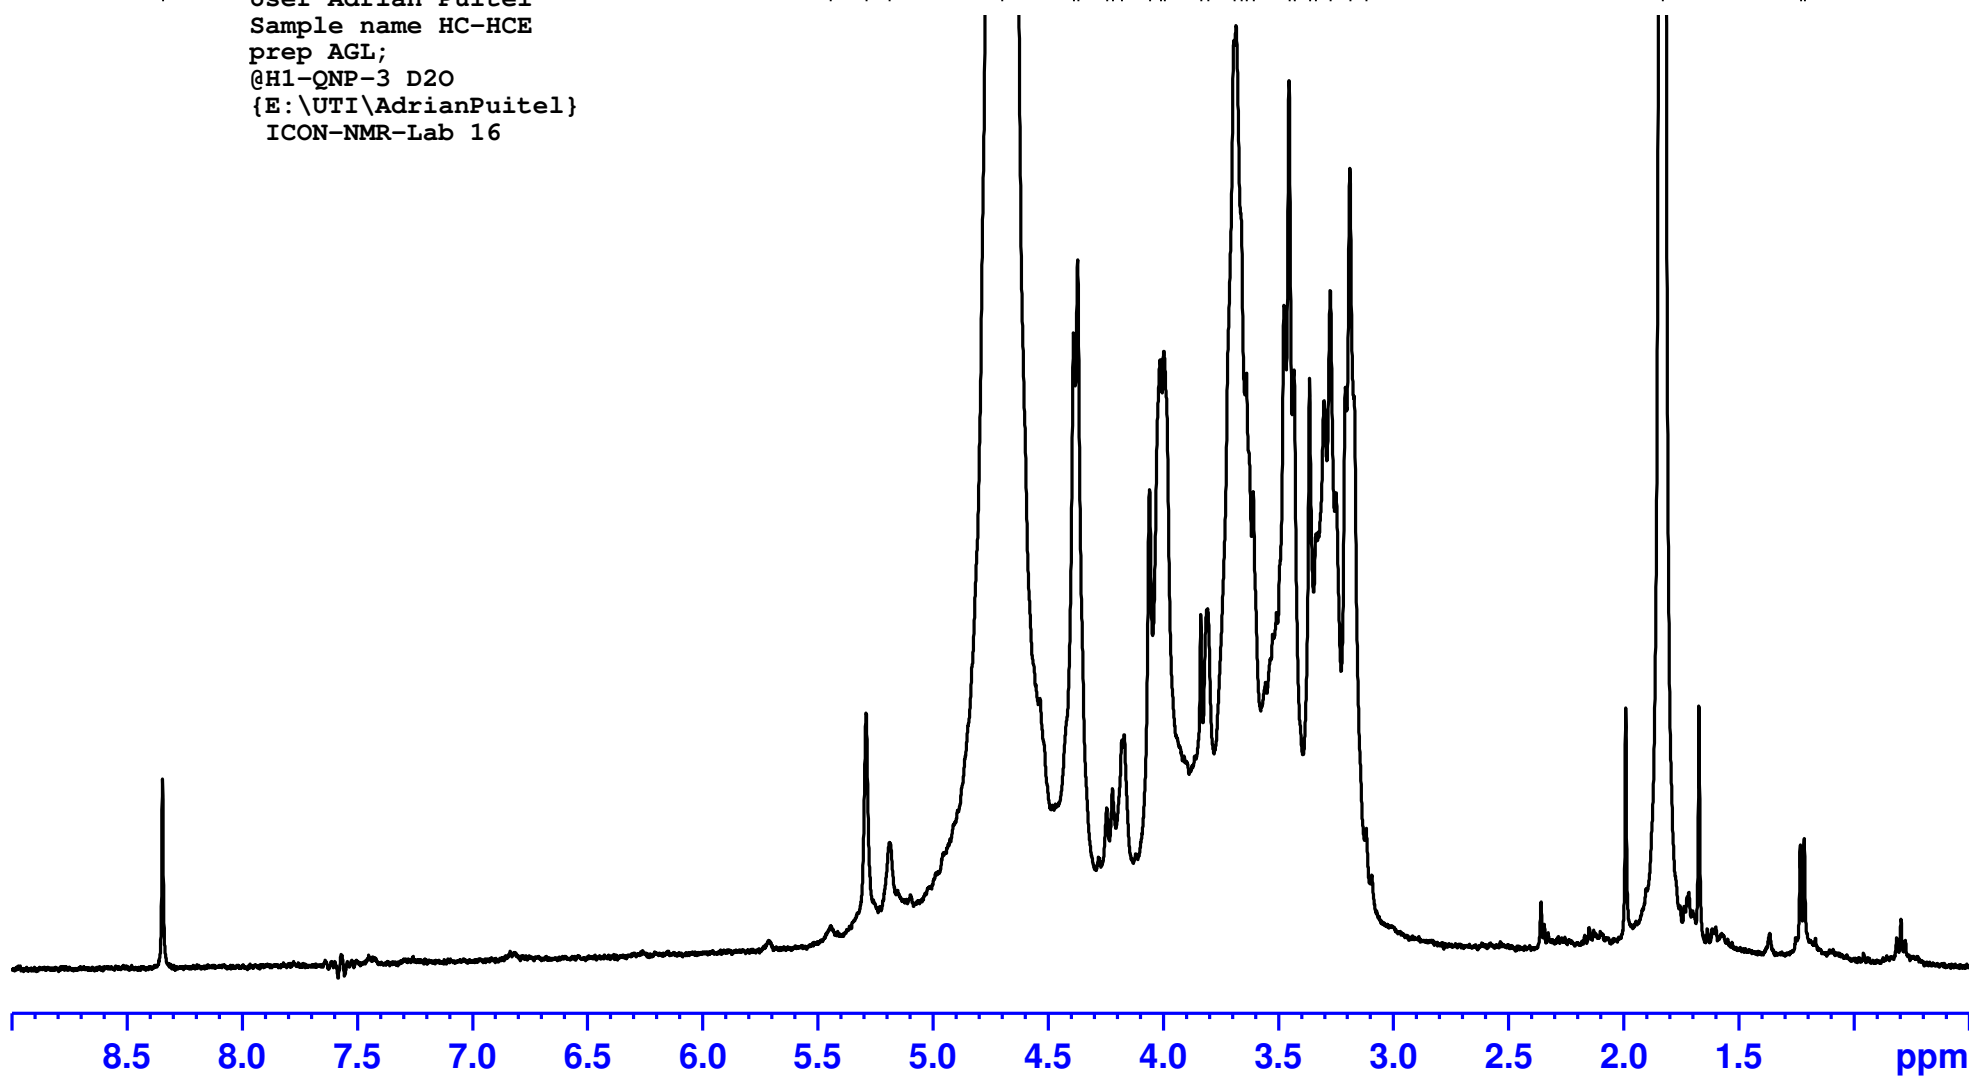

0.25

0.51

1.00

0.86

4.33

2.45

6.75

2.37

9.69

6.80

6.57

4.87

0.60

35.42

0.22

0.75

0.31

— 8.35

Instrument Bruker  
NEO-1 400 (ICMPP)  
Operator AGL  
Registry No 14013  
User Adrian Puitel  
Sample name XSA  
prep AGL;  
@H1-QNP-3 D2O  
{E:\UTI\AdrianPuitel}  
ICON-NMR-Lab 10

5.19

4.70

4.53

4.52

4.39

4.37

4.24

4.22

4.01

4.00

3.69

3.66

3.52

3.46

3.43

3.36

3.34

3.28

3.19

3.12

2.40

2.34

— 1.81

— 1.21

— 0.95

— 0.79

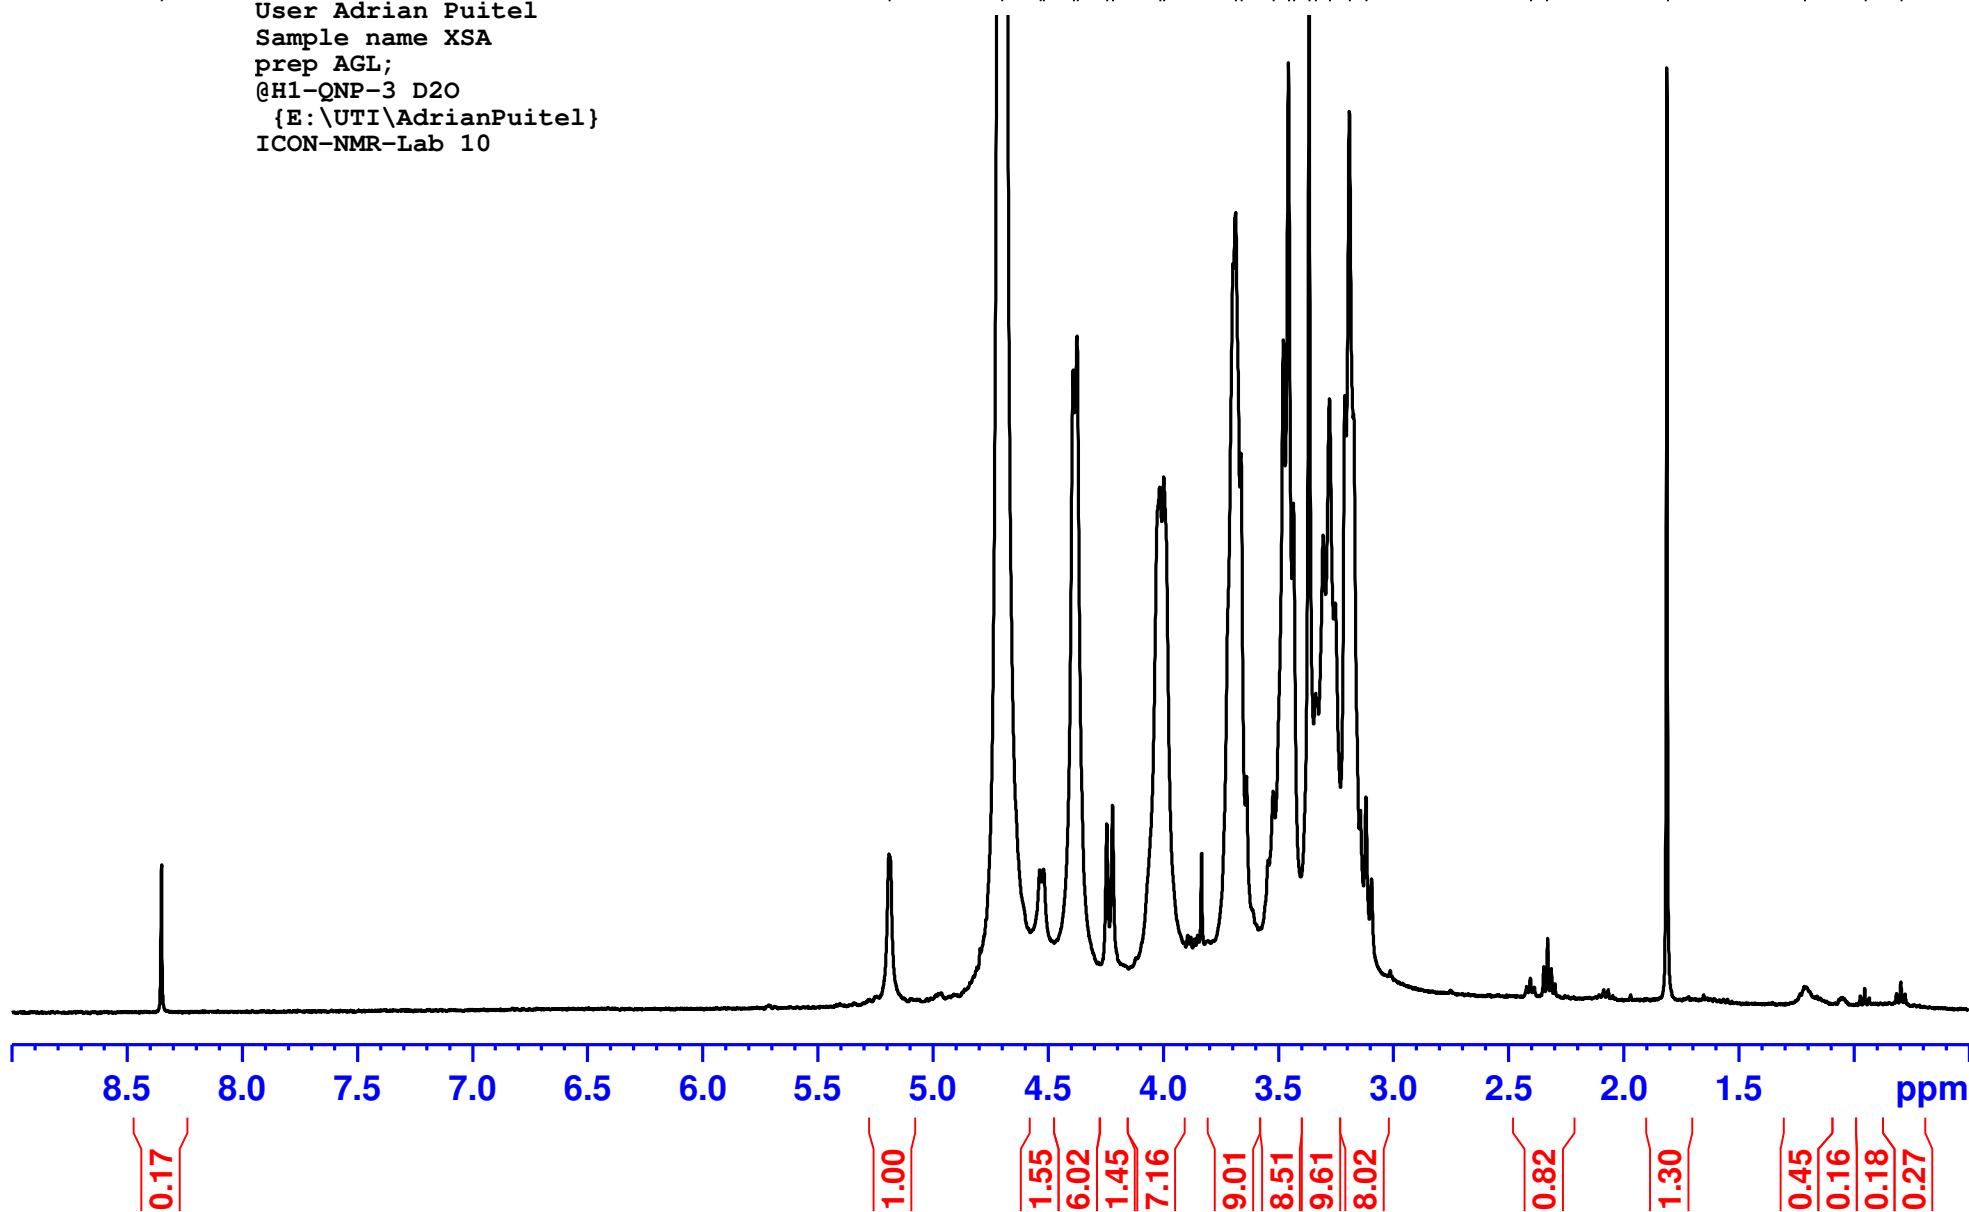

Supplement: s1 [file s1]
