# Supplementary material for: Integrated Hemicellulose Extraction and Papermaking Fiber Production from Agro-Waste Biomass
Source: MDPI journal article supplement (doi:10.3390/polym15234597), 2023-12-01
Supplement: s1 [file s1]

## Integrated hemicellulose extraction and papermaking fiber production from agro-waste biomass

Adrian Cătălin Puișel<sup>1</sup>, Cătălin Dumitrel Balan<sup>1</sup>, Gabriela-Liliana Ailiesei<sup>2</sup>, Elena Niculina Drăgoi<sup>1</sup>, Mircea Teodor Nechita<sup>1</sup>,

<sup>1</sup> "Gheorghe Asachi" Technical University, Iasi, Faculty of Chemical Engineering and Environmental Protection "Cristofor Simionescu", Bd. Prof. Dimitrie Mangeron, No. 73, 700050, Iași, România

<sup>2</sup> "Petru Poni" Institute of Macromolecular Chemistry, 41A Grigore Ghica Voda Alley, 700487, Iași, România,

**Table S1. ANOVA for Response Surface 2FI Model (XHC%)**

| Analysis of variance table [Partial sum of squares - Type III] |          |    |          |           |          |                 |
|----------------------------------------------------------------|----------|----|----------|-----------|----------|-----------------|
|                                                                | Sum of   |    | Mean     | F         | p-value  |                 |
| Source                                                         | Squares  | df | Square   | Value     | Prob > F |                 |
| Model                                                          | 395.8821 | 6  | 65.98035 | 20.44098* | < 0.0001 | significant     |
| A-Temperature (oC)                                             | 7.520282 | 1  | 7.520282 | 2.329814  | 0.155    |                 |
| B-CNaOH (%)                                                    | 217.8757 | 1  | 217.8757 | 67.49878  | < 0.0001 |                 |
| C-Time (minutes)                                               | 6.24377  | 1  | 6.24377  | 1.934345  | 0.192    |                 |
| AB                                                             | 105.3127 | 1  | 105.3127 | 32.62629  | 0.000136 |                 |
| AC                                                             | 25.45098 | 1  | 25.45098 | 7.884816  | 0.0170   |                 |
| BC                                                             | 61.77161 | 1  | 61.77161 | 19.1371   | 0.00111  |                 |
| Residual                                                       | 35.50631 | 11 | 3.227847 |           |          |                 |
| Lack of Fit                                                    | 32.31505 | 9  | 3.590561 | 2.250242  | 0.345    | not significant |
| Pure Error                                                     | 3.191267 | 2  | 1.595633 |           |          |                 |
| Cor Total                                                      | 431.3884 | 17 |          |           |          |                 |

\*The Model F-value of 20.44 implies that the model is significant. There is only a 0.01% chance that a "Model F-value" this large could occur due to noise.

**Table S2 ANOVA analysis for XRCS%**

| Analysis of variance table [Partial sum of squares - Type III] |          |    |          |          |          |                 |
|----------------------------------------------------------------|----------|----|----------|----------|----------|-----------------|
|                                                                | Sum of   |    | Mean     | F        | p-value  |                 |
| Source                                                         | Squares  | df | Square   | Value    | Prob > F |                 |
| Model                                                          | 381.7653 | 7  | 54.5379  | 21.4931* | < 0.0001 | significant     |
| A-Temperature (oC)                                             | 267.1714 | 1  | 267.1714 | 105.2908 | < 0.0001 |                 |
| B-CNaOH (%)                                                    | 27.90389 | 1  | 27.90389 | 10.99678 | 0.00510  |                 |
| C-Time (minutes)                                               | 18.67925 | 1  | 18.67925 | 7.361392 | 0.0168   |                 |
| AB                                                             | 46.22989 | 1  | 46.22989 | 18.21896 | 0.000780 |                 |
| AC                                                             | 11.15897 | 1  | 11.15897 | 4.397689 | 0.0546   |                 |
| BC                                                             | 2.205    | 1  | 2.205    | 0.868979 | 0.367    |                 |
| B^2                                                            | 8.435116 | 1  | 8.435116 | 3.324234 | 0.0897   |                 |
| Residual                                                       | 35.52446 | 14 | 2.537461 |          |          |                 |
| Lack of Fit                                                    | 29.59366 | 9  | 3.288184 | 2.772125 | 0.137    | not significant |
| Pure Error                                                     | 5.9308   | 5  | 1.18616  |          |          |                 |
| Cor Total                                                      | 417.2898 | 21 |          |          |          |                 |

\* The Model F-value of 21.49 implies that the model is significant.

**Table S3 ANOVA for Response Surface Reduced Cubic Model (tensile index)**

| Analysis of variance table [Partial sum of squares - Type III] |             |    |          |           |          |                 |
|----------------------------------------------------------------|-------------|----|----------|-----------|----------|-----------------|
|                                                                | Sum of      |    | Mean     | F         | p-value  |                 |
| Source                                                         | Squares     | df | Square   | Value     | Prob > F |                 |
| Model                                                          | 300.0538328 | 9  | 33.33931 | 18.83502* | < 0.0001 | significant     |
| A-Temperature (oC)                                             | 6.890006722 | 1  | 6.890007 | 3.892503  | 0.0800   |                 |
| B-CNaOH (%)                                                    | 23.64987847 | 1  | 23.64988 | 13.36098  | 0.00527  |                 |
| C-Time (minutes)                                               | 7.751168181 | 1  | 7.751168 | 4.379016  | 0.0659   |                 |
| AB                                                             | 1.06579121  | 1  | 1.065791 | 0.602118  | 0.458    |                 |
| AC                                                             | 8.463906209 | 1  | 8.463906 | 4.781676  | 0.0566   |                 |
| BC                                                             | 15.06108267 | 1  | 15.06108 | 8.508746  | 0.0171   |                 |
| A^2                                                            | 90.36291695 | 1  | 90.36292 | 51.05045  | < 0.0001 |                 |
| B^2                                                            | 51.81776624 | 1  | 51.81777 | 29.2744   | 0.000427 |                 |
| Residual                                                       | 15.93063781 | 9  | 1.770071 |           |          |                 |
| Lack of Fit                                                    | 6.872499529 | 2  | 3.43625  | 2.655485  | 0.139    | not significant |
| Pure Error                                                     | 9.058138282 | 7  | 1.29402  |           |          |                 |
| Cor Total                                                      | 315.9844706 | 18 |          |           |          |                 |

\*The Model F-value of 18.84 implies that the model is significant

**Table S4 ANOVA for Response Surface Reduced Cubic Model (burst index)**

| Analysis of variance table [Partial sum of squares - Type III] |             |    |          |           |          |             |
|----------------------------------------------------------------|-------------|----|----------|-----------|----------|-------------|
|                                                                | Sum of      |    | Mean     | F         | p-value  |             |
| Source                                                         | Squares     | df | Square   | Value     | Prob > F |             |
| Model                                                          | 3.861846723 | 9  | 0.429094 | 15.36422* | 0.000191 | significant |
| A-Temperature (oC)                                             | 0.021907626 | 1  | 0.021908 | 0.784428  | 0.399    |             |
| B-CNaOH (%)                                                    | 0.003275195 | 1  | 0.003275 | 0.117272  | 0.740    |             |
| C-Time (minutes)                                               | 0.028211495 | 1  | 0.028211 | 1.010146  | 0.341    |             |
| AB                                                             | 0.678003123 | 1  | 0.678003 | 24.2767   | 0.000817 |             |
| AC                                                             | 0.18975851  | 1  | 0.189759 | 6.794527  | 0.0284   |             |
| BC                                                             | 0.003268068 | 1  | 0.003268 | 0.117017  | 0.740    |             |
| A^2                                                            | 0.09029045  | 1  | 0.09029  | 3.232956  | 0.106    |             |
| B^2                                                            | 0.000339045 | 1  | 0.000339 | 0.01214   | 0.915    |             |
| Residual                                                       | 0.251353277 | 9  | 0.027928 |           |          |             |
| Lack of Fit                                                    | 0.179569944 | 2  | 0.089785 | 8.755442  | 0.0124   | significant |
| Pure Error                                                     | 0.071783333 | 7  | 0.010255 |           |          |             |
| Cor Total                                                      | 4.1132      | 18 |          |           |          |             |

\* The Model F-value of 15.36 implies that the model is significant
