# Supplementary material for: Integrated Hemicellulose Extraction and Papermaking Fiber Production from Agro-Waste Biomass
Source: MDPI journal article supplement (doi:10.3390/polym15234597), 2023-12-01
Supplement: s1 [file s1]

---

# Supplementary Materials: Integrated hemicellulose extraction and papermaking fiber production from agro-waste biomass

Adrian Cătălin Puițel, Cătălin Dumitrel Balan, Gabriela-Liliana Ailiesei, Elena Niculina Drăgoi, Mircea Teodor Nechita

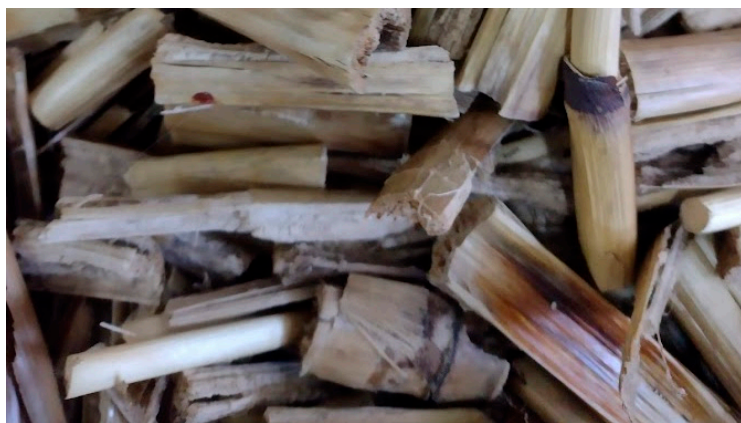

**Figure S1.** Corn stalks chopped and shredded.

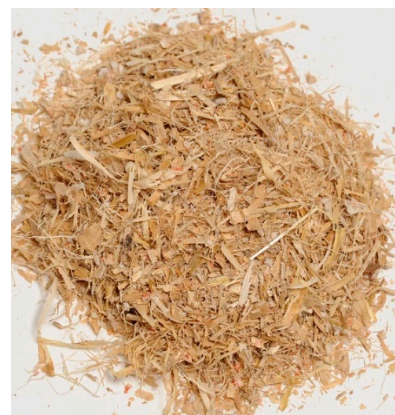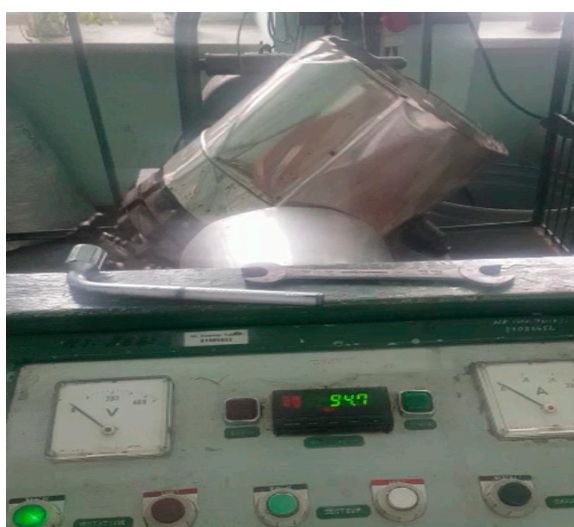

**Figure S2.** The pulping reactor.

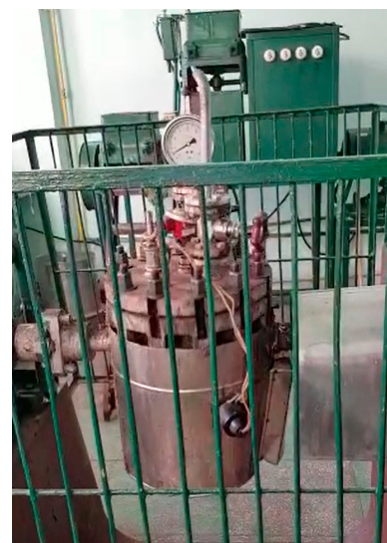

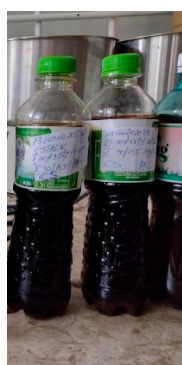

Storage bottles

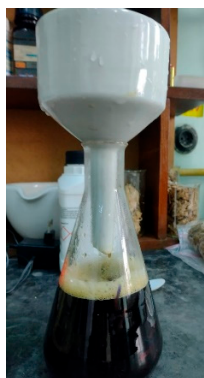

Fines removal (filtering)

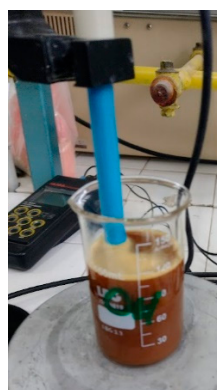

Lignin precipitation

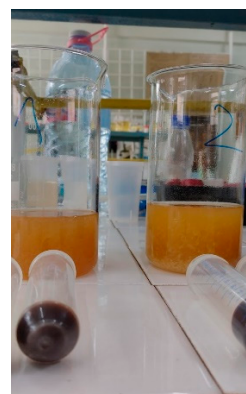

Hemicellulose separation

**Figure S3.** Various stages of liquid phase processing.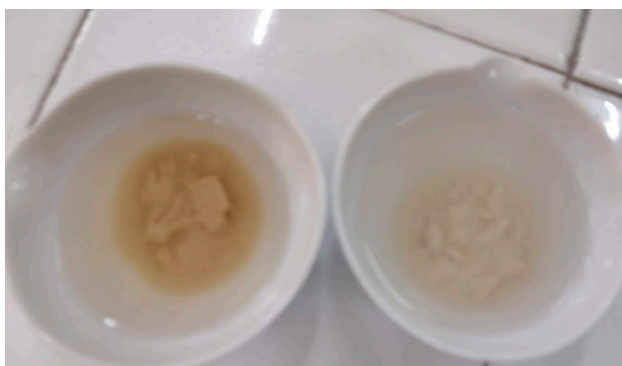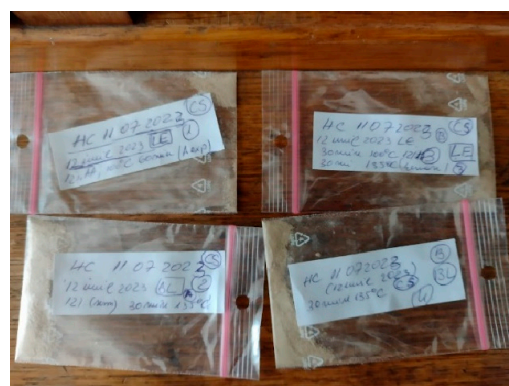**Figure S4.** Hemicelluloses samples (before and after drying).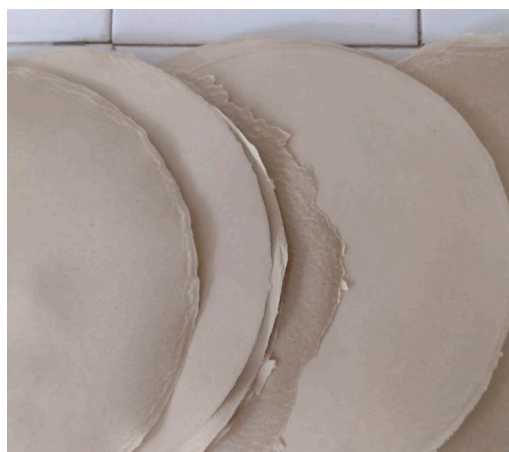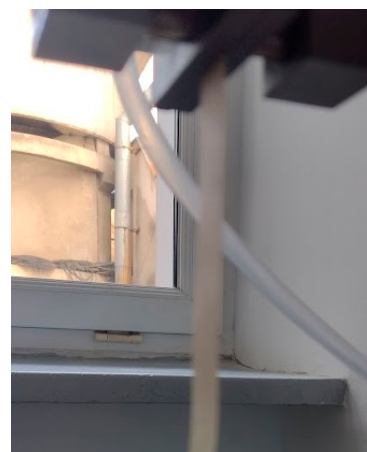**Figure S5.** Paper sheets and preliminary strength testing.
