# Supplementary material for: Integrated Hemicellulose Extraction and Papermaking Fiber Production from Agro-Waste Biomass
Source: Polymers (Basel). 2023 Dec 1;15(23):4597. doi: 10.3390/polym15234597 (PMC10708159; doi:10.3390/polym15234597)
Supplement: Supplementary file 1 [file polymers-15-04597-s001.zip]

Archive with 4 entries (4 files):
- polymers-2711413-supplementary revised.pdf
- Supplementary File S1 ANOVA.pdf
- Supplementary File S2 1H-NMR spectra.pdf
- Supplementary File S3 FTIR data.pdf
